# Supplementary material for: Profibrogenic effect of high-mobility group box protein-1 in human dermal fibroblasts and its excess in keloid tissues
Source: Sci Rep. 2018 May 30;8:8434. doi: 10.1038/s41598-018-26501-6 (PMC5976629; doi:10.1038/s41598-018-26501-6)

**Profibrogenic effect of high-mobility group box protein-1  
in human dermal fibroblasts and its excess in keloid tissues**

Won Jai Lee<sup>1</sup>, Seung Yong Song<sup>1</sup>, Hyun Roh<sup>1</sup>, Hyo Min Ahn<sup>2</sup>, Youjin Na<sup>2</sup>, Jihee Kim<sup>3</sup>, Ju  
Hee Lee<sup>3§</sup>, Chae Ok Yun<sup>2§</sup>

<sup>1</sup>Institute for Human Tissue Restoration, Department of Plastic & Reconstructive Surgery,  
Yonsei University College of Medicine, Seoul, Korea

<sup>2</sup>Department of Bioengineering, College of Engineering, Hanyang University, Seoul, Korea

<sup>3</sup>Department of Dermatology and Cutaneous Biology Research Institute,  
Yonsei University College of Medicine, Seoul, Korea

Word count: 3457

Number of figures: 6, Number of tables: 0

Supplementary table : 1, Supplementary figure: 2

**Financial Disclosure:** The authors have no proprietary or commercial interest in any  
materials discussed in this article.

**A short running head:** Profibrogenic effect of HMGB1 in fibroblasts

**§Corresponding author:**

Chae Ok Yun, Ph.D.

Department of Bioengineering, College of Engineering,

Hanyang University, 222 Wangsimni-ro, Seongdong-gu, Seoul, Korea

E-mail: [chaekok@hanyang.ac.kr](mailto:chaekok@hanyang.ac.kr) Tel:+82-2-2220-0491. Fax:+82- 2-2220-1886

Ju Hee Lee, M. D., Ph.D.

Department of Dermatology and Cutaneous Biology Research Institute,

Yonsei University College of Medicine, 50 Yonsei-ro, Seodaemun-gu, Seoul, Korea

E-mail: [juhee@yuhs.ac](mailto:juhee@yuhs.ac) Tel: +82-2-2228-2080. Fax:+82-2-393-6947

**Supplementary Table 1.** Demographic information and descriptions of the keloids from the patients who participated in this study.

| <b>Case<br/>(No.)</b> | <b>Sex</b> | <b>Age<br/>(years)</b> | <b>Keloid Site</b>    | <b>Others</b>                               |
|-----------------------|------------|------------------------|-----------------------|---------------------------------------------|
| <b>K1</b>             | <b>M</b>   | <b>31</b>              | <b>Chest</b>          | <b>IHC</b>                                  |
| <b>K2</b>             | <b>F</b>   | <b>33</b>              | <b>Ear lobe</b>       | <b>IHC</b>                                  |
| <b>K3</b>             | <b>F</b>   | <b>11</b>              | <b>Knee</b>           | <b>IHC</b>                                  |
| <b>K4</b>             | <b>F</b>   | <b>50</b>              | <b>Anterior Chest</b> | <b>IHC</b>                                  |
| <b>K5</b>             | <b>F</b>   | <b>5</b>               | <b>Ankle</b>          | <b>IHC</b>                                  |
| <b>K6</b>             | <b>F</b>   | <b>18</b>              | <b>Earlobe</b>        | <b>WB</b>                                   |
| <b>K7</b>             | <b>F</b>   | <b>17</b>              | <b>Earlobe</b>        | <b>WB, IHC</b>                              |
| <b>K8</b>             | <b>M</b>   | <b>53</b>              | <b>Shoulder</b>       | <b>WB, IHC</b><br><b>Immunofluorescence</b> |
| <b>K11</b>            | <b>F</b>   | <b>24</b>              | <b>Earlobe</b>        | <b>WB, IHC</b><br><b>Immunofluorescence</b> |
| <b>K12</b>            | <b>F</b>   | <b>33</b>              | <b>Abdomen</b>        | <b>WB, IHC</b><br><b>Immunofluorescence</b> |
| <b>N1</b>             | <b>F</b>   | <b>54</b>              | <b>Abdomen</b>        | <b>Spheroid, IHC</b>                        |
| <b>N2</b>             | <b>F</b>   | <b>46</b>              | <b>Thigh</b>          | <b>Spheroid, IHC</b>                        |
| <b>N3</b>             | <b>M</b>   | <b>54</b>              | <b>Back</b>           | <b>Spheroid, IHC</b><br><b>WB</b>           |

**Supplementary Figure S1.** (a) Immunohistochemical analysis in normal dermal spheroids. (b) Increased expression of TGF- $\beta$ 1 protein was observed in normal dermal spheroids treated with HMGB1 (400 ng and 1000 ng) (\*\* $p < 0.01$ ).

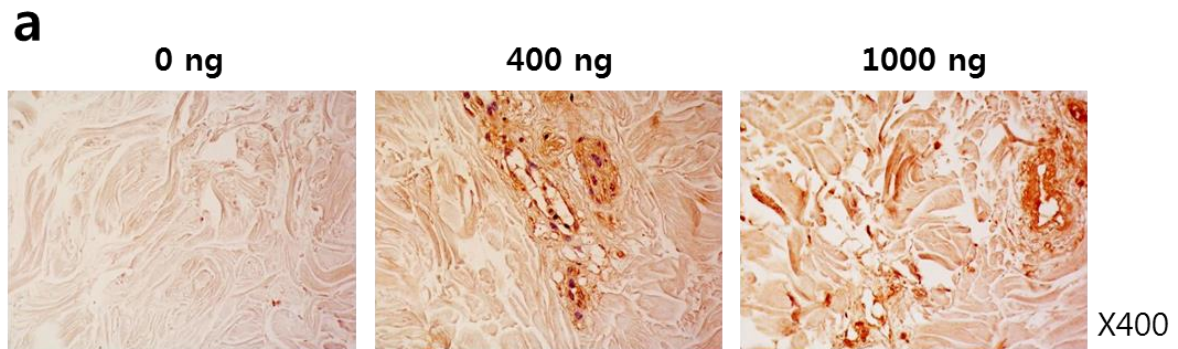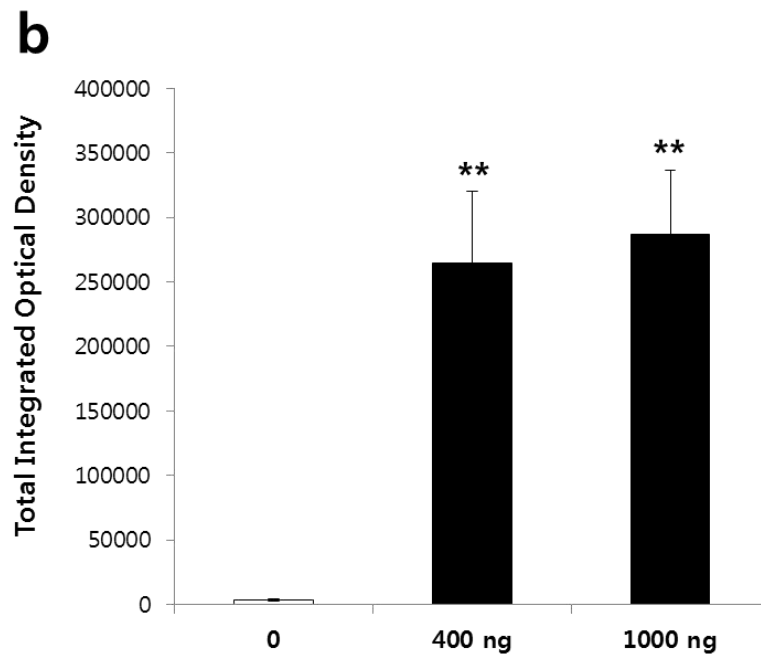

**Supplementary Figure S2.** MMP-1 mRNA/TIMP1 mRNA ratio. MMP-1/TIMP1 mRNA ratio was significantly decreased following treatment with HMGB1 (50 ng) (\*\* $p < 0.01$ )

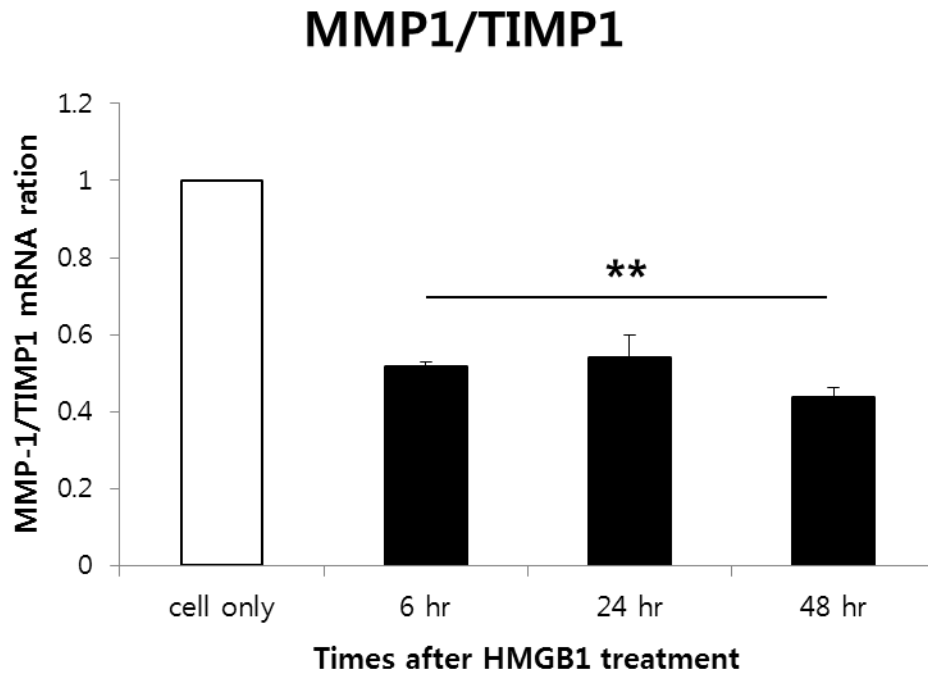

Supplement: Supplementary file 1 — Supplementary Information [file 41598_2018_26501_MOESM1_ESM.pdf]
